# Supplementary material for: Tunable electronic and optical properties in buckling a non-lamellar B3S monolayer
Source: Royal Society of Chemistry journal article supplement (doi:10.1039/d1cp02286e), 2021-01-01
Supplement: d1cp02286e1.pdf [file d1cp02286e1.pdf]

## Supplementary information

### **Tunable electronic and optical properties in bucking one- atom-thin non-lamellar B<sub>3</sub>S monolayer**

Shaohua Lu,<sup>\*</sup> Yiyuan Cai, and Xiaojun Hu<sup>\*</sup>

College of Materials Science and Engineering, Zhejiang University of Technology,

Hangzhou 310014, China

E-mail: lsh@zjut.edu.cn(S.Lu); huxj@zjut.edu.cn(X.Hu)

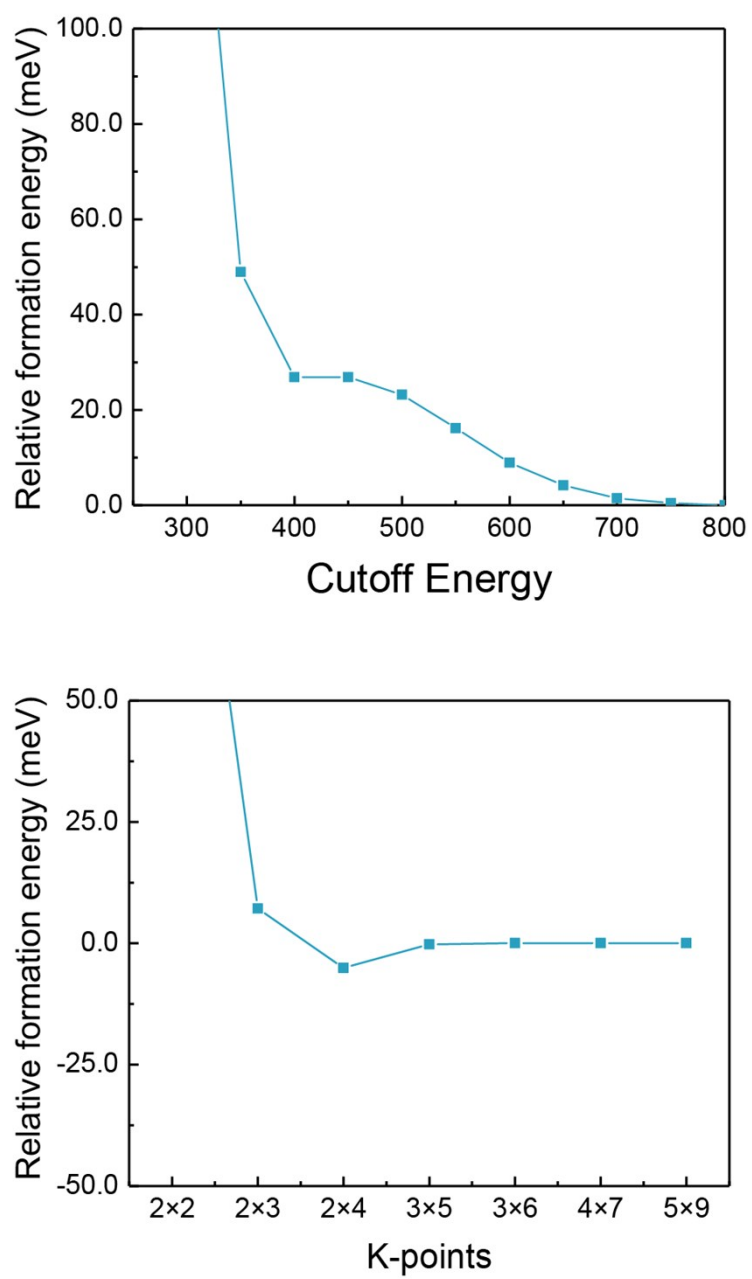

**Fig. S1.** The convergence test with respect to cutoff energy and K-point mesh of the h1-B<sub>3</sub>S monolayer using an orthogonal supercell.

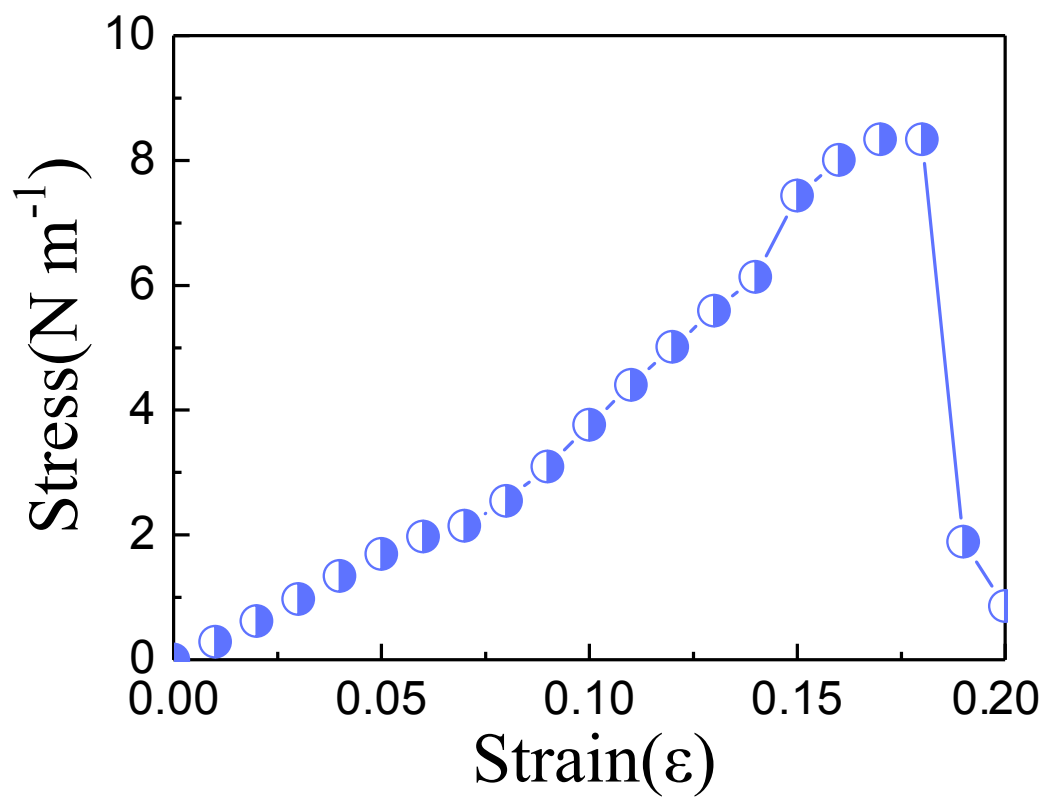

**Fig. S2.** The stress-strain diagram of the h1-B3S monolayer.

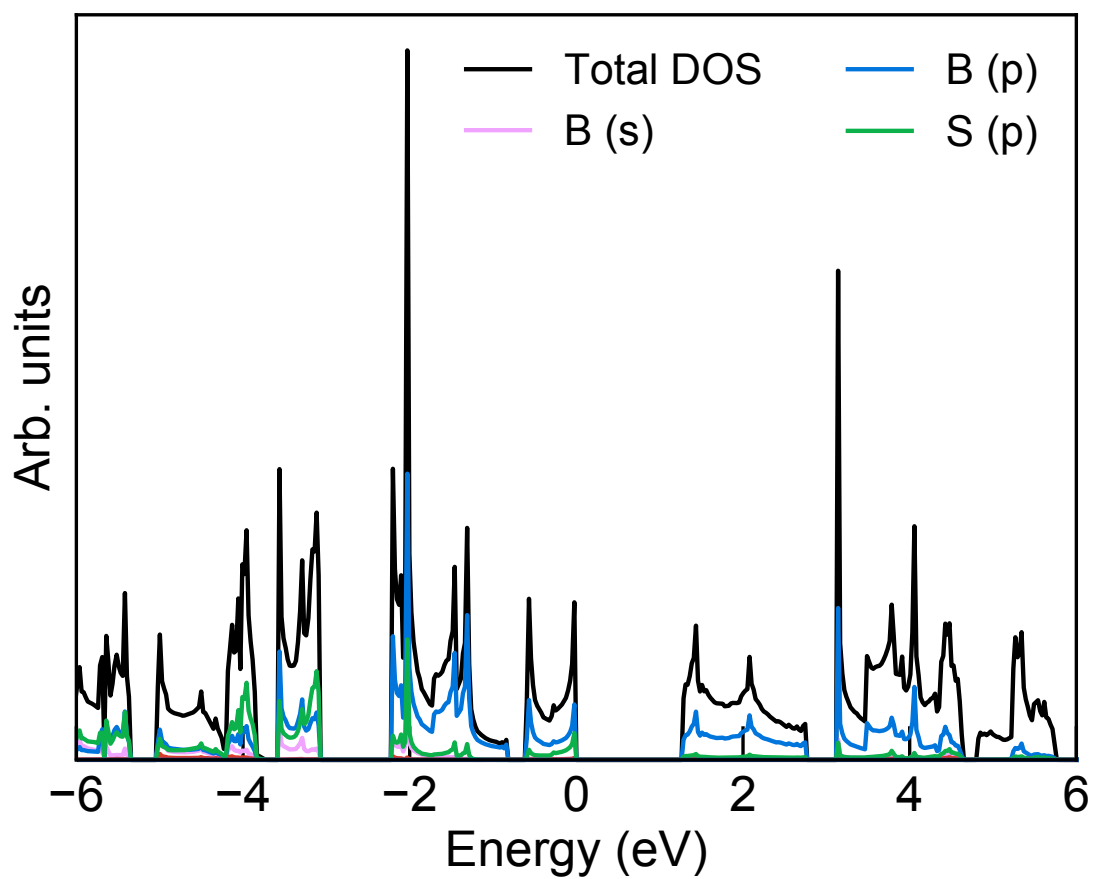

**Fig. S3.** Total and orbital projected DOS of the h1-B3S monolayer.

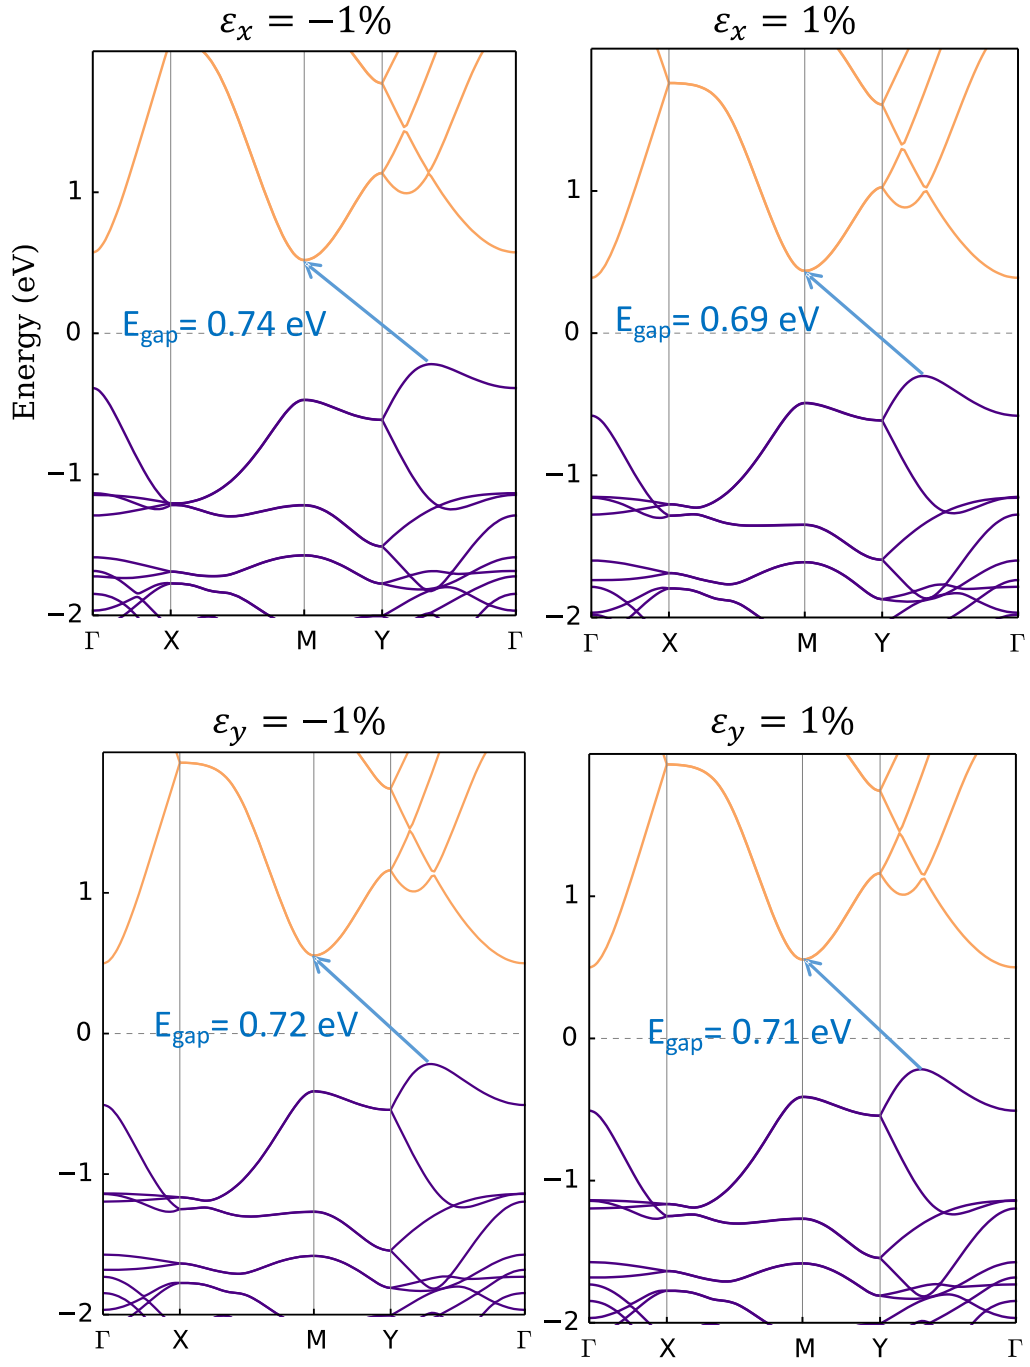

**Fig. S4.** Band structures of oxidized B<sub>3</sub>S monolayer under uniaxial strains.

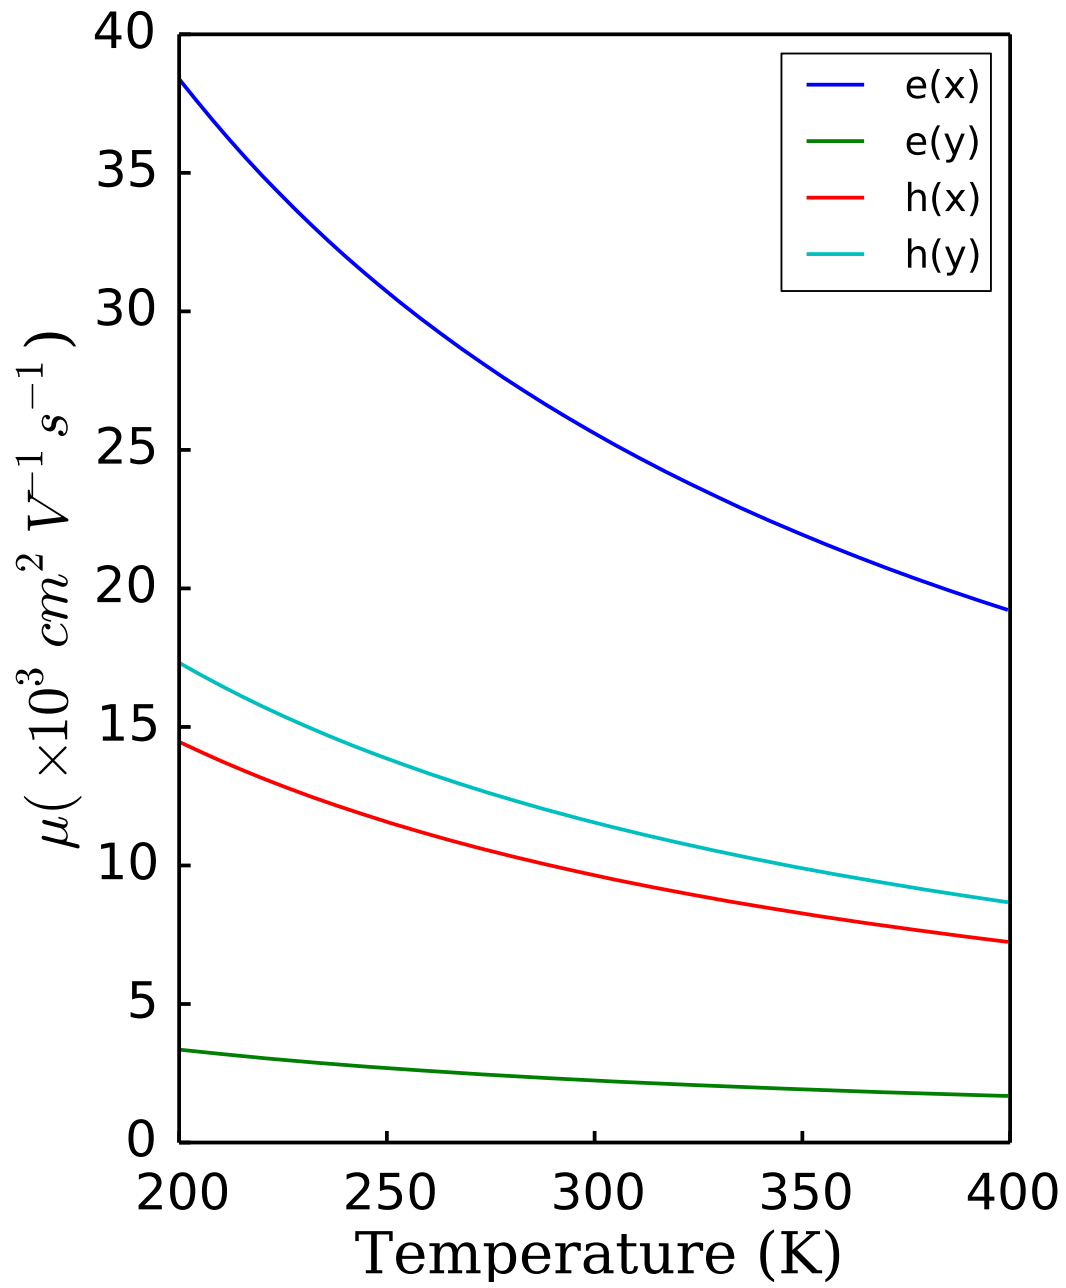

**Fig. S5.** Temperature dependent carrier mobilities along x and y directions.

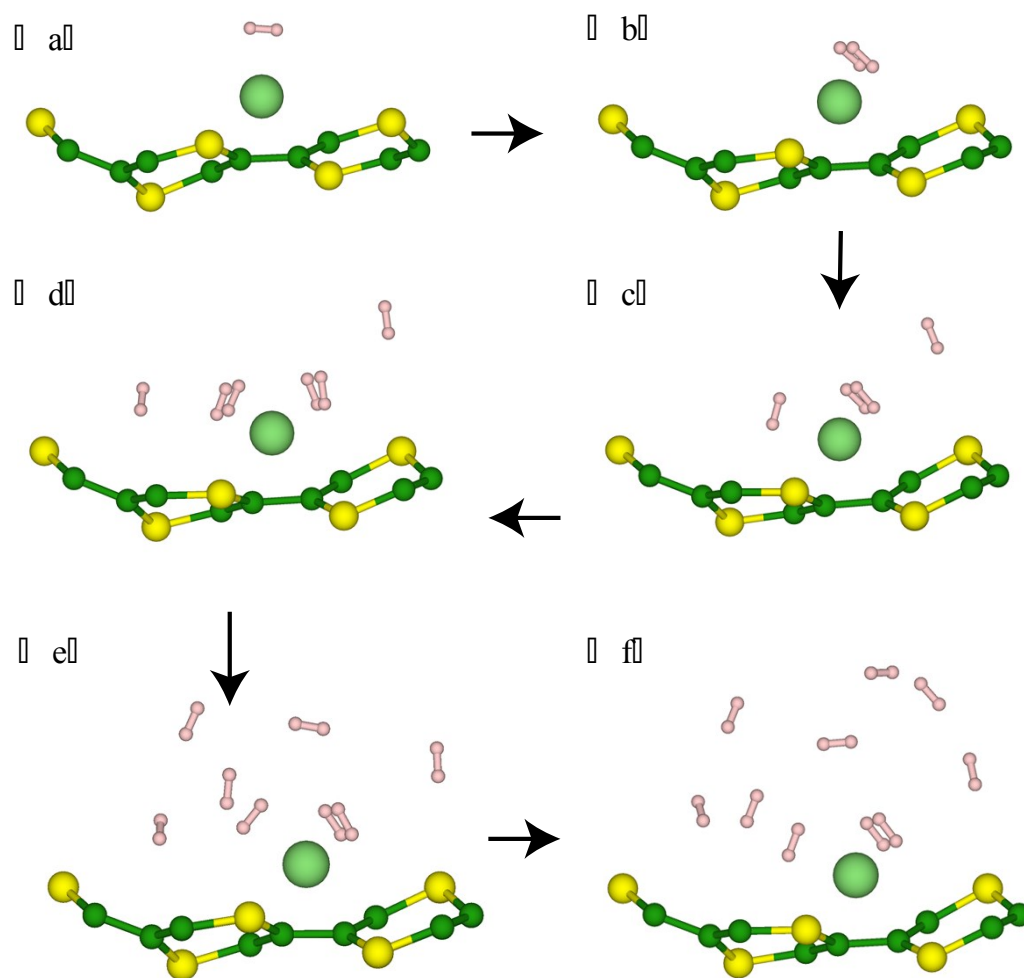

**Fig. S6.** Atomic configurations of  $\text{H}_2$  adsorbed on Li-decorated  $\text{h1-B}_3\text{S}$  monolayer.

Table S1. Atomic configuration and adsorption energies of fully oxidized h1-B<sub>3</sub>S using pure PBE and PBE plus various vdW correction methods.

| vdW method | Lattice constant<br>(Å) | S-O bond length<br>(Å) | E <sub>ads-O</sub><br>(eV) |
|------------|-------------------------|------------------------|----------------------------|
| Pure PBE   | 5.669                   | 1.484                  | -0.34                      |
| PBE+D2     | 5.661                   | 1.483                  | -0.37                      |
| PBE+TS     | 5.637                   | 1.483                  | -0.43                      |
| PBE+TS+SCS | 5.644                   | 1.485                  | -0.38                      |
